# Supplementary material for: The influence of crystalline structure of cellulose in chitosan-based biocomposites on removal of Ca(II), Mg(II), Fe(III) ion in aqueous solutions
Source: Springer Nature journal article supplement (doi:10.1007/s10570-021-03899-3), 2021-05-14
Supplement: MOESM1 [file 19164490]

The experimental curves were deconvoluted using WAXSFIT program.

Linear function was used to set the base line and Cauchy-Gauss function was applied to approximate an amorphous halo and crystalline peaks.


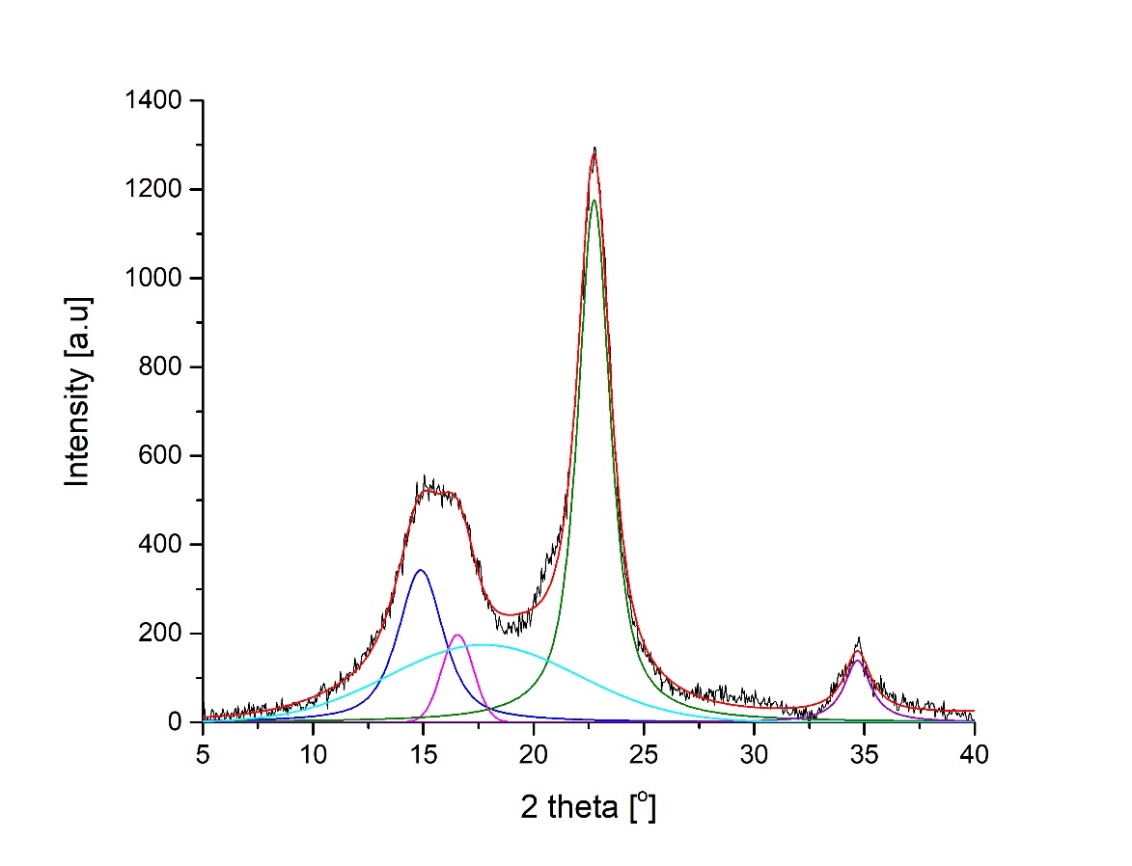


Fig. 1. Deconvolution of XRD curve for C I


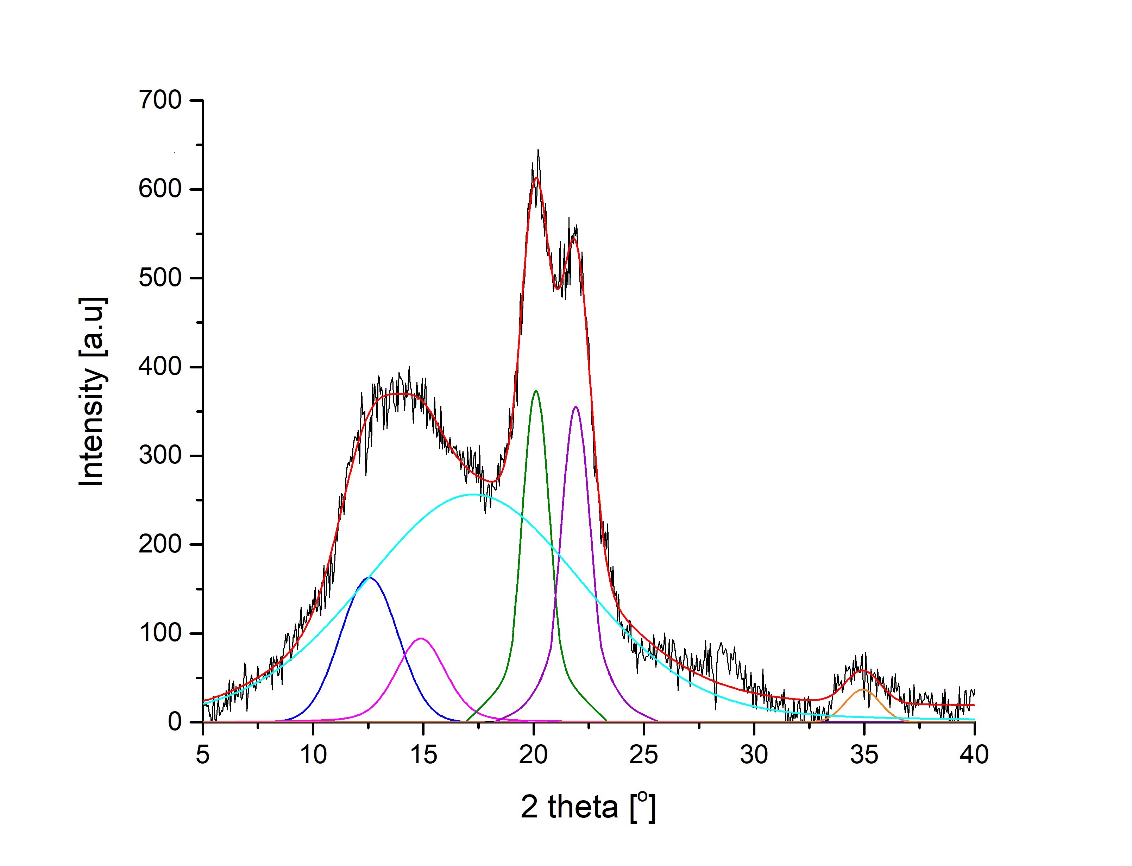


Fig. 2. Deconvolution of XRD curve for C II


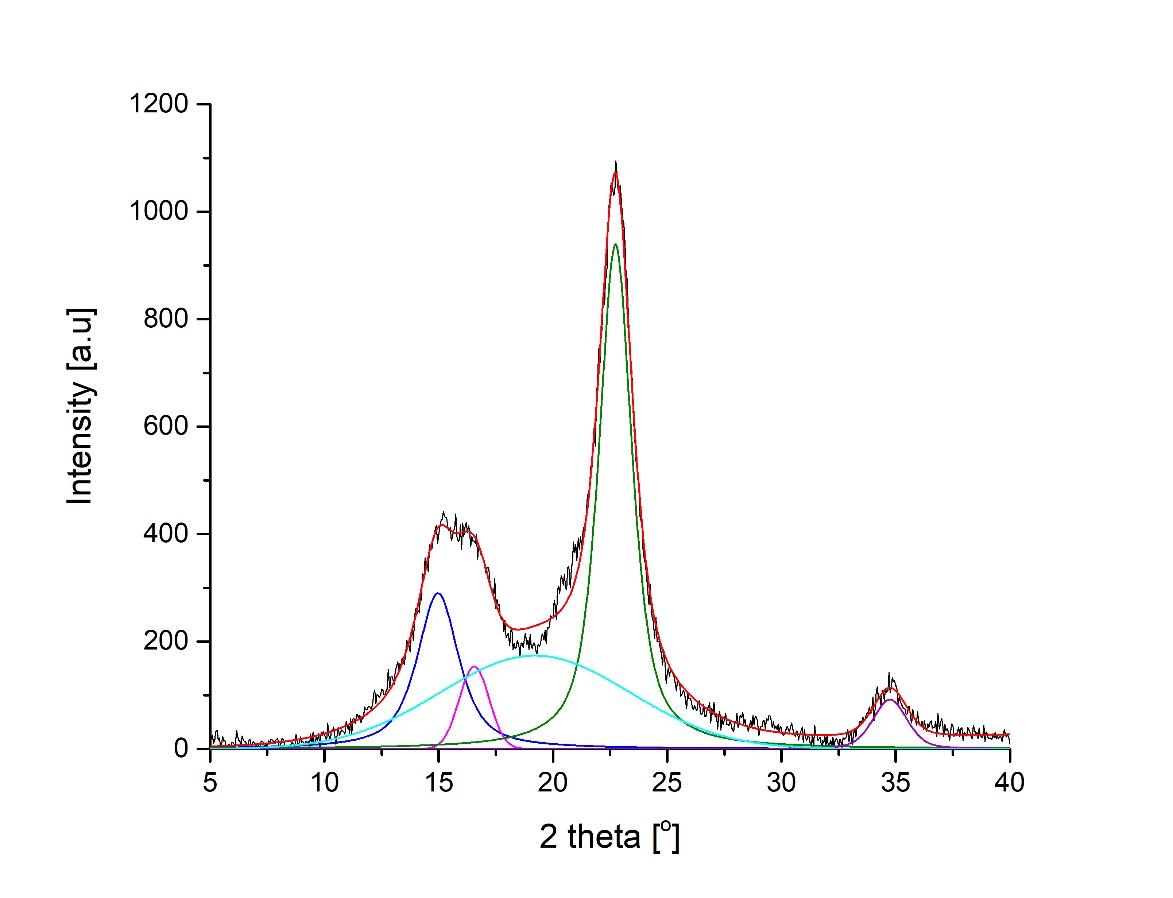


Fig. 3. Deconvolution of XRD curve for CNC I


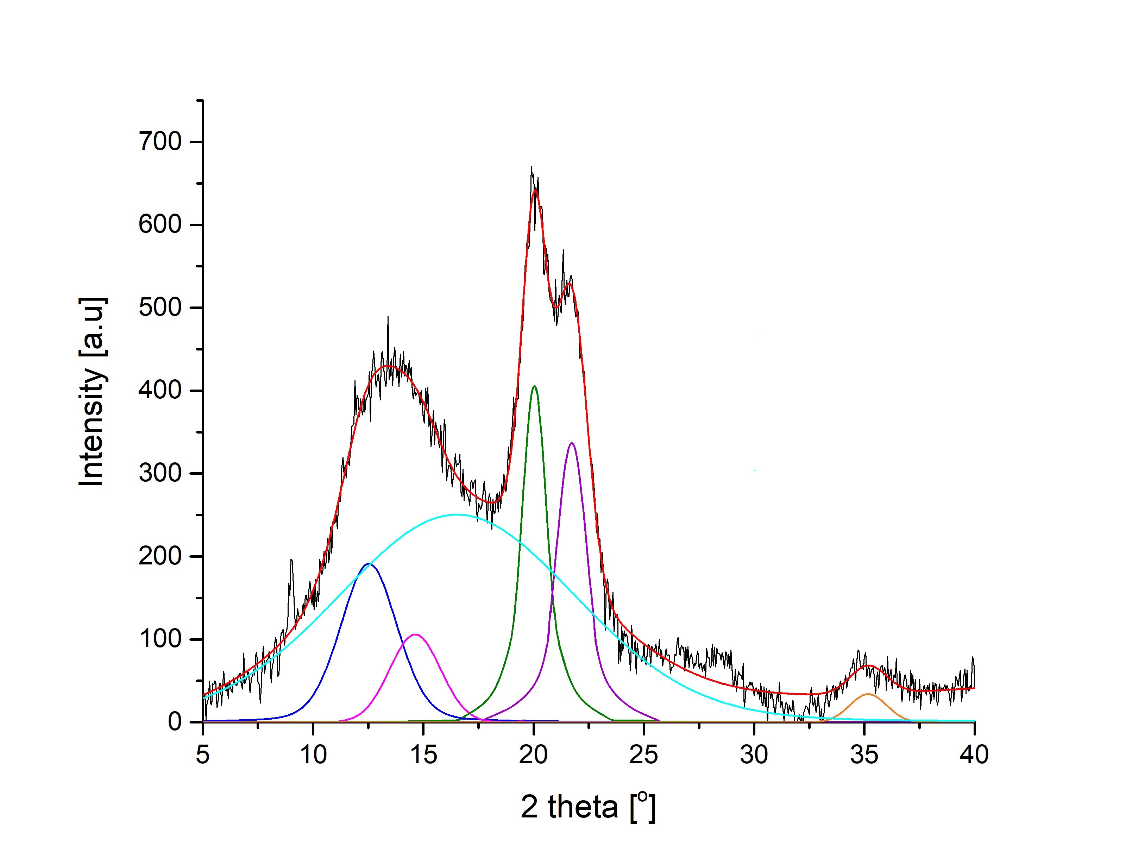


Fig. 4. Deconvolution of XRD curve for CNC II
